# Supplementary material for: Specific chemical bond relaxation unraveled by analysis of shake-up satellites in the oxygen single site double core hole spectrum of CO2
Source: Royal Society of Chemistry journal article supplement (doi:10.1039/d1cp03947d), 2021-11-22
Supplement: d1cp03947d1.pdf [file d1cp03947d1.pdf]

### Supplementary materials

#### O K<sup>-1</sup> main line/shake-up ratio in CO<sub>2</sub>

We report the experimental O K<sup>-1</sup> spectra of the CO<sub>2</sub> molecule recorded at a photon energy of 625 eV. Intensity ratio between main and shake-up lines are estimated. Note that for the shake-up region, one should not associate a given fit function with a unique shake-up transition (see for example the fit function labeled “0” which clearly accounts for more than one shake-up line).

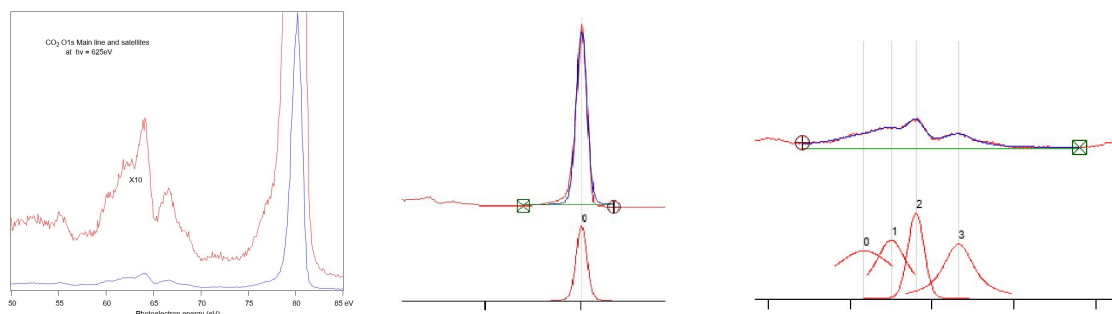

FIG. 1: Left: Experimental O K<sup>-1</sup> spectrum of CO<sub>2</sub> recorded for a photon energy of 625 eV. Center: Experimental and Voigt fit of the main peak of the O K<sup>-1</sup> spectrum of CO<sub>2</sub>. Right: Experimental and Voigt fit of the main shake-up region of the O K<sup>-1</sup> spectrum of CO<sub>2</sub>.

TABLE I: Area of the functions used to fit the O K<sup>-1</sup> spectrum of CO<sub>2</sub>

|                                           | Main line | Peak 0 | Peak 1 | Peak 2 | Peak 3 |
|-------------------------------------------|-----------|--------|--------|--------|--------|
| Area                                      | 55031     | 5825.4 | 3364.2 | 1609.6 | 2725.5 |
| Area ratio<br>(with respect to main line) | 1.0       | 0.106  | 0.061  | 0.029  | 0.049  |

#### Vibrational profile of the main peak of the C K<sup>-1</sup> spectrum of CO

We applied the computational approach described in the main body of the paper to compute the vibrational profile associated with the main peak of the C K<sup>-1</sup> spectrum of CO. The computed profile is in very good agreement with the experimental one despite a slight overestimation of the Franck-Condon width due to the harmonic approximation.

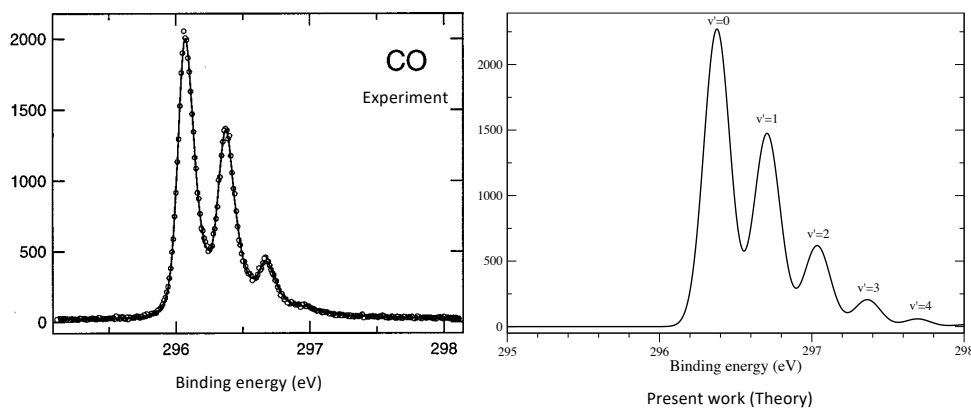

FIG. 2: Left: Experimental vibrational profile of the main peak of the C K<sup>-1</sup> spectrum of CO (extracted from Ref. [T. Darrah-Thomas, *et. al.*, J. Chem. Phys 118, 10221 (2002)]) Right: Vibrational profile of the main peak of the C K<sup>-1</sup> spectrum of CO computed using the computational method presented in the main body of the paper.
